# Supplementary material for: Genetic Diversity among Enterococcus faecalis
Source: PLoS One. 2007 Jul 4;2(7):e582. doi: 10.1371/journal.pone.0000582 (PMC1899230; doi:10.1371/journal.pone.0000582)
Supplement: Table S2 — Supplemental Table 2–Strain data chart (0.19 MB XLS) [file pone.0000582.s003.xls]

## Sheet: Sheet1
Supplemental Table 2--Strain data chart						A	B	C	D	E	F			Auxiliary traits							Antibiotic resistances
strain	date	source	ddl/efaA	MLST	CPS	nuc-1	cylB	esp	hyd	psaA	gls-2	CYL	cylM	cylA	BSH	cbh	GEL	gelE	fsrB	Gm	Em	Cm	Tet	Amp	Van
F1	early 1900s	milk	ü	72	5	x	ü	x	x	x	x	ü	ü	ü	ü	ü	x	ü	ü	x	x	x	x	LL	x
SS-7	1918	cheese	ü	72	5	x	ü	x	x	x	x	ü	ü	ü	ü	ü	ü	ü	ü	x	x	x	x	x	x
atcc4200	1926-03-23	blood	ü	105	5	x	x	ü	ü	ü	x	x	x	x	ü	ü	x	ü	x	x	x	x	x	x	x
SS-6	1930s	unknown	ü	21	1	x	ü	x	x	x	x	ü	ü	ü	ü	ü	ü	ü	ü	x	x	x	x	x	x
X98	1934	infant/fecal	ü	19	1	x	ü	ü	ü	ü	x	ü	ü	ü	ü	ü	x	ü	ü	x	x	x	x	x	x
atcc6055	<1937	milk	ü	113	1	x	x	x	x	x	x	x	x	x	x	x	x	ü	ü	x	x	x	x	x	x
D173	1939-07-16	blood	ü	112	2	x	x	x	x	x	x	x	x	x	x	ü	x	ü	x	x	x	x	x	x	x
atcc19433	<1942	ref strain	ü	25	1	x	x	ü	x	x	x	x	x	x	ü	ü	x	ü	x	x	x	x	x	x	x
atcc10100	<1948	ref strain	ü	114	1	x	x	ü	x	ü	x	x	x	x	ü	ü	ü	ü	ü	x	x	x	x	x	x
T16	<1951	infant/fecal	ü	19	1	x	x	ü	ü	ü	x	x	x	x	ü	ü	x	ü	ü	x	x	x	x	x	x
T17	<1951	infant/fecal	ü	66	1	x	x	ü	x	ü	x	x	x	x	ü	ü	x	ü	x	x	x	x	x	x	x
T18	<1951	infant/fecal	ü	71	5	ü	x	x	x	x	x	x	x	x	x	x	ü	ü	ü	x	x	x	x	x	x
T19	<1951	infant/fecal	ü	91	1	ü	x	ü	x	ü	x	x	x	x	ü	ü	ü	ü	ü	x	x	x	x	x	x
T20	<1951	infant/fecal	ü	22	1	x	x	x	x	x	x	x	x	x	ü	x	ü	ü	ü	x	x	x	x	x	x
T21	<1951	infant/fecal	ü	30	5	x	x	ü	ü	ü	x	x	x	x	ü	ü	x	ü	x	x	x	x	x	x	x
RMC1	1954-02-18	clinical	ü	90	2	x	ü	ü	ü	ü	x	ü	ü	ü	ü	ü	x	ü	x	x	x	x	M	LL	x
RMC5	1954-12-14	clinical	ü	53	2	x	x	x	x	x	x	x	x	x	ü	x	ü	ü	ü	x	x	x	M	x	x
B653	1956-04-25	blood/endo	ü	111	5	x	x	x	x	x	x	x	x	x	x	x	ü	ü	ü	x	x	x	x	x	x
E1	1960s	endocarditis	ü	40	1	ü	x	ü	x	ü	x	x	x	x	ü	ü	ü	ü	ü	x	x	x	M	x	x
RM3817	1960s	blood	ü	40	1	x	x	ü	x	ü	x	x	x	x	x	ü	x	ü	ü	x	x	x	M	x	x
RM4679	1960s	blood	ü	9	5	x	x	ü	ü	ü	x	x	x	x	ü	ü	ü	ü	ü	x	x	CAT	M	x	x
E1Sol	1960s	fecal	ü	93	1	ü	x	x	x	x	x	x	x	x	ü	ü	ü	ü	ü	x	x	x	x	x	x
atcc27275	<1962	unknown	ü	40	1	x	x	ü	x	ü	x	x	x	x	ü	ü	ü	ü	ü	x	x	x	M	x	x
RMC65	1963-11-21	unknown	ü	110	1	x	x	ü	x	ü	x	x	x	x	x	x	x	ü	ü	x	x	x	x	x	x
39-5	<1964	oral	ü	94	2	x	ü	x	x	x	x	ü	ü	ü	ü	ü	x	x	x	x	x	x	x	x	x
FA2-2	<1973	clinical	ü	8	2	x	x	x	x	x	x	x	x	x	ü	ü	x	ü	x	x	x	x	x	x	x
T15	1973	wound	ü	40	1	x	x	ü	x	x	x	x	x	x	x	ü	ü	ü	ü	x	x	x	M	x	x
JH1	<1974	clinical	ü	40	1	x	ü	ü	x	x	x	ü	ü	ü	ü	ü	x	ü	ü	ü	B	x	M/L	x	x
DS5	<1974	?	ü	55	1	ü	ü	ü	ü	ü	x	ü	ü	ü	ü	ü	x	x	x	x	B	x	M/L	x	x
atcc29200	<1974	urogenital	ü	21	1	x	x	ü	ü	ü	x	x	x	x	ü	ü	x	ü	x	x	x	x	x	x	x
OG1RF	<1975	oral	ü	1	1	x	x	x	x	x	x	x	x	x	x	x	ü	ü	ü	x	x	x	x	x	x
atcc27959	<1975	cow	ü	40	1	x	x	ü	x	ü	x	x	x	x	x	ü	ü	ü	ü	x	x	x	x	x	x
5952	<1976	clinical	ü	30	5	ü	ü	x	ü	ü	x	ü	ü	ü	x	x	x	ü	x	x	x	x	M	x	x
DS16	<1978	clinical	ü	40	1	x	ü	x	x	x	x	ü	ü	ü	x	x	x	ü	ü	x	B	x	M	x	x
RC73	<1979	clinical	ü	40	1	ü	ü	ü	x	ü	x	ü	ü	ü	ü	ü	ü	ü	ü	x	x	x	M	x	x
atcc35038	<1982	chicken	ü	59	1	x	x	x	x	x	x	x	x	x	ü	ü	ü	ü	ü	x	x	x	M	x	x
HH22	x/1981	urine	ü	6	2	ü	x	x	ü	ü	x	x	x	x	ü	ü	ü	ü	ü	HLG	x	x	M	BLA	x
A-2-1	early 1980s	infant/sepsis	ü	62	1	x	x	ü	x	x	x	x	x	x	ü	ü	x	ü	x	x	x	x	M	x	x
A-3-1	early 1980s	infant/sepsis	ü	40	1	ü	x	ü	x	ü	x	x	x	x	ü	ü	ü	ü	ü	x	x	x	M	x	x
B-4-111	early 1980s	infant/sepsis	ü	95	1	x	ü	x	x	x	x	ü	ü	ü	x	x	ü	ü	ü	x	x	x	x	x	x
SF19	mid 1980s	clinical	ü	6	2	ü	ü	x	ü	ü	ü	x	ü	ü	ü	ü	ü	ü	ü	HLG	B	x	M	x	x
MMH594	1985	blood	ü	6	2	ü	ü	ü	ü	ü	ü	ü	ü	ü	ü	ü	ü	ü	ü	HLG	B	x	x	x	x
SF100	mid 1980s	clinical	ü	6	2	ü	ü	x	ü	ü	ü	x	ü	ü	ü	ü	ü	ü	ü	HLG	B	x	M	x	x
SF105	mid 1980s	clinical	ü	9	5	ü	x	ü	ü	ü	x	x	x	x	ü	ü	ü	ü	ü	HLG	B	x	ü	x	x
SF339	1986	clinical	ü	106	5	ü	ü	ü	x	x	x	ü	ü	ü	x	ü	x	ü	ü	HLG	x	x	ü	x	x
SF350	1986	clinical	ü	64	1	ü	x	x	x	ü	x	x	x	x	ü	ü	x	ü	x	HLG	B	x	M	x	x
SF370	1986	clinical	ü	6	2	ü	ü	ü	ü	ü	ü	x	ü	ü	ü	ü	ü	ü	ü	HLG	x	x	x	x	x
WH571	1986-11-01	urine	ü	9	5	ü	x	ü	ü	ü	x	x	x	x	ü	ü	ü	ü	ü	HLG	B	CAT	L	BLA	x
CH19	1987-07-01	wound	ü	9	5	ü	x	ü	ü	ü	x	x	x	x	ü	ü	x	ü	ü	HLG	?B	blot+	M	BLA	x
WH245	<1987	urine	ü	9	5	ü	ü	ü	x	x	x	ü(lt)	ü	ü	ü	ü	ü	ü	ü	x	B	CAT	ü	BLA	x
WH257	<1987	urine	ü	9	5	ü	x	x	x	x	x	x	x	x	ü	ü	ü	ü	ü	HLG	B	x	ü	BLA	x
CH570	<1987	blood	ü	6	2	ü	x	x	ü	ü	ü	x	x	x	ü	ü	ü	ü	ü	HLG	B	CAT	M/L	BLA	x
V583	1987-02-12	blood	ü	6	2	ü	x	x	ü	ü	ü	x	ü	x	ü	ü	ü	ü	ü	HLG	B	x	x	x	VB
V587	1987-02-26	urine	ü	6	2	ü	ü*	ü	ü	ü	ü	x	ü	ü	ü	ü	ü	ü	ü	HLG	B	x	x	x	VB
CH116	1987/1988	fecal	ü	9	5	ü	x	ü	ü	ü	x	x	x	x	ü	ü	x	ü	ü	HLG	B	x	M	BLA	x
						A	B	C	D	E	F			Auxiliary traits							Antibiotic resistances
strain	date	source	ddl/efaA	MLST	CPS	nuc-1	cylB	esp	hyd	psaA	gls-2	CYL	cylM	cylA	BSH	cbh	GEL	gelE	fsr	Gm	Em	Cm	Tet	Amp	Van
CH136	1987/1988	urine	ü	9	5	ü	x	ü	ü	ü	x	x	x	x	ü	ü	x	ü	ü	HLG	B	x	M	BLA	x
CH188	late 80s	liver	ü	9	5	ü	x	ü	ü	ü	x	x	x	x	ü	ü	x	ü	ü	HLG	B	CAT	M	BLA	x
SF1592	late 80s	clinical	ü	6	2	ü	x	ü	ü	ü	ü	x	x	x	ü	ü	ü	ü	ü	HLG	B	CAT	M/L	BLA	x
T1	<1950	unknown	ü	21	1	x	ü	x	x	x	x	x*	ü	ü	ü	ü	x	ü	ü	x	x	x	x	x	x
T2	<1992	urine	ü	11	2	ü	ü	ü	ü	ü	ü	x	ü	ü	x	ü	x	ü	x	HLG	B	x	M/L	x	x
T3	<1992	urine	ü	67	1	x	x	x	x	x	x	x	x	x	ü	ü	ü	ü	ü	x	x	x	M/L	x	x
T4	<1992	urine	ü	62	1	x	x	ü	x	x	x	x	x	x	ü	ü	x	ü	x	x	x	x	M	x	x
T5	<1992	urine	ü	68	5	x	x	x	x	x	x	x	x	x	x	x	x	ü	ü	x	x	x	x	x	x
T6	<1992	urine	ü	63	5	ü	x	x	x	x	x	x	x	x	ü	ü	ü	ü	ü	x	x	x	x	x	x
T7	<1992	urine	ü	64	1	ü	x	ü	ü	ü	x	x	x	x	x	ü	x	ü	x	x	B	x	M	x	x
T8	<1992	urine	ü	8	2	ü	ü	ü	ü	ü	x	ü	ü	ü	ü	ü	x	ü	x	x	B	x	M/L	x	x
T9	<1992	urine	ü	69	1	x	x	ü	x	x	x	x	x	x	ü	ü	x	ü	ü	x	x	x	M	x	x
T10	<1992	urine	ü	70	1	x	x	x	x	x	x	x	x	x	x	x	ü	ü	ü	x	x	x	M	x	x
T11	<1992	urine	ü	65	2	x	x	x	x	x	x	x	x	x	x	x	ü	ü	ü	x	x	x	x	x	x
T12	<1992	urine	ü	36	5	x	x	x	ü	ü	ü	x	x	x	x	x	ü	ü	ü	x	B	x	M/L	x	x
T13	<1992	urine	ü	21	1	x	x	x	x	x	x	x	x	x	x	x	ü	ü	ü	x	x	x	x	x	x
T14	<1992	urine	ü	9	5	x	ü	ü	ü	ü	x	ü	ü	ü	ü	ü	ü	ü	ü	x	x	x	ü	x	x
SF5039	1991-01-01	urine	ü	64	1	x	ü	ü	ü	ü	x	ü	ü	ü	x	ü	x	ü	x	x	B	CAT	M/L	LL	VB
SF6375	1991-10-01	clinical	ü	64	1	ü	ü	ü	ü	ü	x	ü	ü	ü	ü	ü	x	ü	x	HLG	B	CAT	M/L	x	VB
YI6-1	<1992	clinical	ü	28	2	x	ü	ü	ü	ü	ü	ü	ü	ü	ü	ü	x	ü	x	ü	x	x	M	x	x
TR161	1993-10-23	blood	ü	6	2	ü	ü	x	ü	ü	x	x	ü	ü	ü	ü	ü	ü	ü	HLG	B	x	x	x	x
TR197	1993-10-30	blood	ü	109	1	x	ü	x	ü	ü	ü	x	ü	ü	x	x	ü	ü	ü	HLG	B	x	ü	x	x
599951	1994-03-06	blood	ü	64	1	ü	x	ü	ü	ü	ü	x	x	x	ü	ü	x	ü	x	HLG	B	x	M	x	VB
SF21520	mid 1990s	blood	ü	6	2	ü	x	x	ü	ü	ü	x	x	x	ü	ü	ü	ü	ü	HLG	B	CAT	M	LL	VA
SF21521	mid 1990s	blood	ü	28	2	ü	ü	ü	ü	x	x	ü	ü	ü	ü	ü	x	ü	x	HLG	B	CAT	M/L	LL	VA
12030	mid 1990s	clinical	ü	64	1	x	x	ü	ü	ü	x	x	x	x	ü	ü	x	ü	x	x	x	x	M	x	x
12107	mid 1990s	clinical	ü	21	1	x	x	x	x	x	x	x	x	x	x	x	ü	ü	ü	x	x	x	M	x	x
79-3	1999-10-04	blood	ü	64	1	ü	x	ü	ü	ü	x	x	x	x	ü	ü	x	ü	x	x	B	x	M	x	VB
AR01/DG	2001-08-01	dog	ü	108	2	x	x	x	x	x	x	x	x	x	x	x	ü	ü	ü	x	B	x	M/L	x	VA*
SF24396	2001	urine	ü	21	1	x	x	ü	x	ü	x	x	x	x	x	x	x	ü	x	x	x	x	M	x	x
SF24397	2001	urine	ü	2	5	ü	x	x	ü	ü	x	x	x	x	x	x	ü	ü	ü	HLG	B	x	ü	x	x
SF24413	2002	urine	ü	2	5	ü	x	x	ü	ü	ü	x	x	x	x	x	x	ü	ü	HLG	B	x	x	x	VB
SF26630	2002	urine	ü	6	2	ü	ü	x	x	x	x	x	ü	ü	ü	ü	ü	ü	ü	HLG	B	x	x	x	VB
HIP11704	x/2002	clinical	ü	4	2	ü	ü	ü	ü	ü	x	ü	ü	ü	ü	ü	x	ü	x	HLG	B	x	x	x	VA
Merz89	2002-07-06	blood	ü	40	1	ü	ü	ü	x	ü	x	ü	ü	ü	ü	ü	ü	ü	ü	x	x	x	M	x	x
Merz96	2002-05-03	blood	ü	103	1	ü	ü	x	x	ü	x	ü	ü	ü	x	x	ü	ü	ü	HLG	B	x	M	LL	VB
Merz151	2002-12-06	blood	ü	104	1	ü	x	x	ü	ü	ü	x	x	x	x	x	x	ü	x	HLG	B	x	x	x	VA
Merz192	2002-05-05	blood	ü	40	1	ü	x	ü	x	ü	x	x	x	x	ü	ü	ü	ü	ü	x	x	CAT	M	x	x
Merz204	2002-07-11	blood	ü	40	1	ü	x	ü	x	ü	x	x	x	x	ü	ü	ü	ü	ü	x	x	x	M	x	x
SF28073	2003	urine	ü	2	5	ü	x	x	ü	ü	x	x	x	x	x	x	x	ü	ü	HLG	B	x	x	x	VA
Pan7	2005-03-05	commensal	ü	21	1	x	x	ü	x	ü	x	x	x	x	ü	ü	x	ü	x	x	x	x	M	x	x
Fly1	2005-07-05	drosophila	ü	101	5	x	x	x	x	x	x	x	x	x	x	x	ü	ü	ü	x	x	x	x	x	x
Fly 2	x/x/2005	drosophila	ü	102	5	x	x	x	x	x	x	x	x	x	x	x	x	ü	ü	x	x	x	x	x	x
Com1	2006-02-01	commensal	ü	34	5	ü	x	x	ü	ü	ü	x	x	x	x	x	ü	ü	ü	x	x	x	M	x	x
Com2	2006-02-01	commensal	ü	34	5	ü	x	x	ü	ü	ü	x	x	x	x	x	ü	ü	ü	x	x	x	M	x	x
Com6	2006-02-01	commensal	ü	21	1	x	x	x	x	x	x	x	x	x	x	x	ü	ü	ü	x	x	x	x	x	x
Com7	2006-02-01	commensal	ü	107	1	x	x	x	x	x	x	x	x	x	ü	ü	ü	ü	ü	x	x	x	x	x	x
D3		pig	ü	47	1	x	x	ü	ü	x	x	x	x	x	ü	ü	ü	ü	ü	x	B	x	M	x	x
D6		pig	ü	16	2	ü	ü	ü	ü	ü	ü	ü	ü	ü	ü	ü	x	ü	x	HLG	B	x	M	x	x
Ned10	1961	horse	ü	9	5	ü	ü	ü	ü	ü	x	ü	ü	ü	ü	ü	ü	ü	ü	x	x	CAT	M	x	x
D1	unknown	pig	ü	40	1	x	x	ü	ü	x	x	x	x	x	ü	ü	ü	ü	ü	x	x	x	x	x	x
legend: ü = present, x = absent
	CPS = capsule type; A-F headings represent pathogenicity island genes; CYL, BSH, and GEL represent phenotypes for cytolysin, bile salt hydrolase, and gelatinase
	Antibiotic resistances: Gm = gentamicin, Em = erythromycin, Cm = chloramphenicol, Tet = tetracyclin, Amp = ampicillin, Van = vancomycin. Genotypes are given where known as
	follows: HLG = aac6'-aph2", B = ermB, CAT = cat, L = tetL, M = tetM, BLA = blaZ, LL = low-level ampicillin resistance, VA = vanA, VB = vanB.

## Sheet: Sheet2
			conc.	quality			conc.	quality			conc.	quality		strain	BSH	cbh		cpsB	cpsD	cpsF	cpsI		strain
		strain	ng/ul	260/280		strain	ng/ul	260/280		strain	ng/ul	260/280		T1	ÈÈ	ü				x			T1
		F1				atcc35038				T13				T2	x	ü				ü			T2
		SS-7				HH22				T14				T3	ÈÈ	ü				x			T3
		atcc4200				A-2-1				SF5039				T4	È	ü				x			T4
		SS-6				A-3-1				SF6375				T5	x	x				x			T5
		X98				B-4-111				YI6-1				T6	ÈÈ	ü				x			T6
		atcc6055				SF19				TR161				T7	x	ü				x			T7
		D173				MMH594				TR197				T8	ÈÈ	ü				ü			T8
		atcc19433				SF100				599951				T9	ÈÈ	ü				x			T9
		atcc10100				SF105				SF21520				T10	x	x				x			T10
		T16				SF339				SF21521				T11	x	x				ü			T11
		T17				SF350				12030				T12	x	x				x			T12
		T18				SF370				12107				T13	x	x				x			T13
		T19				WH571				79-3				T14	ÈÈ	ü				x			T14
		T20				CH19				AR01/DG				T15	x	ü				x			T15
		T21				WH245				SF24396				T16	È	ü				x			T16
		RMC1				WH257				SF24397				T17	ÈÈ	ü				x			T17
		RMC5				CH570				SF24413				T18	x	x				x			T18
		B653				V583				SF26630				T19	ÈÈ	ü				x			T19
		E1				V587				HIP11704				T20	È	x				x			T20
		RM3817				CH116				Merz89				T21	È	ü				x			T21
		RM4679				CH136				Merz96				12030	ÈÈ	ü							12030
		E1Sol				CH188				Merz151				12107	x	x							12107
		atcc27275				SF1592				Merz192				SS-7	ÈÈ	ü				x			SS-7
		RMC65				T1				Merz204				atcc4200	È	ü							atcc4200
		39-5				T2				SF28073				SS-6	ÈÈ	ü				x			SS-6
		FA2-2				T3				Pan7				X98	ÈÈ	ü				x			X98
		T15				T4				Fly1				atcc19433	ÈÈ	ü							atcc19433
		JH1				T5				Fly 2				E1Sol	È	ü				x			E1Sol
		DS5				T6				Com1				E1	ÈÈ	ü				x			E1
		atcc29200				T7				Com2				39-5	ÈÈ	ü				ü			39-5
		OG1RF				T8				Com6				JH1	È	ü				x			JH1
		atcc27959				T9				Com7				FA2-2	ÈÈ	ü				ü			FA2-2
		5952				T10				D3				DS5	ÈÈ	ü				x			DS5
		DS16				T11				D6				DS16	x	x							DS16
		RC73				T12				Ned10				atcc29200	ÈÈ	ü							atcc29200
										D1				atcc27959	x	ü							atcc27959
														5952	x	x							5952
														RC73	È	ü							RC73
														HH22	ÈÈ	ü				ü			HH22
														atcc35038	ÈÈ	ü							atcc35038
														A-2-1	ÈÈ	ü				x			A-2-1
														A-3-1	ÈÈ	ü				x			A-3-1
														B-4-111	x	x				x			B-4-111
														SF19	ÈÈ	ü				ü			SF19
														SF1592	ÈÈ	ü				ü			SF1592
														CH19	ÈÈ	ü				x			CH19
														CH116	ÈÈ	ü				x			CH116
														CH136	ÈÈ	ü				x			CH136
														CH188	ÈÈ	ü				x			CH188
														WH245	ÈÈ	ü				x			WH245
														WH257	ÈÈ	ü				x			WH257
														WH571	ÈÈ	ü				x			WH571
														CH570	ÈÈ	ü				ü			CH570
														MMH594	ÈÈ	ü				ü			MMH594
														V583	ÈÈ	ü				ü			V583
														V586	ÈÈ	ü				ü			V586
														V587	ÈÈ	ü				ü			V587
														SF5039	x	ü				x			SF5039
														SF6375	È	ü				x			SF6375
														YI6-1	È	ü				ü			YI6-1
														HIP11704	ÈÈ	ü				ü			HIP11704
														Pan7	ÈÈ	ü							Pan7
														Fly1	x	x							Fly1
														Fly 2	x	x							Fly 2
														Ned10	ÈÈ	ü							Ned10
														D1	ÈÈ	ü							D1
														OG1RF		x							OG1RF
																							SF100
																							SF105
																							SF339
																							SF350
																							SF370
																							SF21520
																							SF21521
																							SF24396
																							SF24397
																							SF24413
																							SF26630
																							SF28073
																							Merz89
																							Merz96
																							Merz151
																							Merz192
																							Merz204
																				ü			161
																				x			197
																							79-3
																							599951
																							Com1
																							Com2
																							Com6
																							SF25
																							SF32
																							SF33
																							SF106
																							SF107
																							SF186
																							SF189
																							SF200
																							SF381
																							SF3502
																							SF18961
																							SF21522
																							SF24398
																							SF24399
																							SF24400
																							SF24422
																							SF24423
																							SF24433
																							SF24499
																							SF24550
																							SF24551
																							SF27097
																							SF27370
																							SF27515
																							SF27820
																							SF27882
																							SF27973
																							SF27983
																							SF28026
																							SF28072
																							Merz80
																							Merz98
																							Merz108
																							Merz123
																							Merz140
																							Merz149
																							Merz165
																							Merz181
																							Merz227
																							Merz242
																				ü			JH2-2
																							atcc6055
																							atcc10100
																							atcc23241
																							atcc14428
																							atcc27275
																							SS-275
																							SS-324
																							SS-441
																				x			OG1X
																							001-69
																							852-69
																							1373-69
																							1731-69
																							2630-69
																							2631-69
																							2633-69
																							2634-69
																							2635-69
																							2637-69
																							2638-69
																							2639-69
																							2864-69
																							3204-69
																							1322-70
																							530-72
																							1919-72
																							1699-72
																							2041-72
																							1759-73
																							1826-73
																							4300-73
																							4478-73
																							4557-73
																							4680-73
																							A220
																							A225
																							A300
																							A304
																							B382
																							B519
																							B633
																							B653
																							B661
																							D173
																							RM447
																							RM1310
																							RM1379
																							RM3817
																							RM4679
																							RM4939
																							RM5071
																							RM6640
																							RM7778
																				x			F1
																				x			F3
																				x			F4
																				x			F5
																				x			F6
																				x			14
																				x			20
																				x			28
																				ü			43
																				x			105
																				x			109
																				x			126
																				x			135
																				x			146
																							A25
																							A27
																							W32944
																							E0115
																							E1198
																							Ned2
																							V105
																							D3
																							D6
																							D18
																							NZ4
																							NZ7
																							NZ10
																							E19
																							E71
																							E73
																							E99
																							E103
																							EV68
																							EV98
																							EV108
																							EV147
																							EV172
																							EV217-2
																							EV321
																							EV408
																							EV419
																							EV447
																							EV479
																							EV564
																							EV586
																							EV596
																							EV609
																							EV632
																							EV638
																							EV650
																							296
																							326
																							545
																							613
																							620
																				ü			RMC1
																				x			RMC2
																				x			RMC3
																				x			RMC4
																				ü			RMC5
																				x			RMC6
																				x			RMC7
																				x			RMC8
																				x			RMC9
																				x			RMC10
																				x			RMC11
																				ü			RMC13
																				x			RMC14
																				x			RMC15
																				x			RMC16
																				x			RMC17
																				x			RMC18
																				x			RMC20
																				x			RMC21
																				x			RMC22
																				ü			RMC23
																				x			RMC24
																				x			RMC25
																				ü			RMC26
																				ü			RMC27
																				x			RMC28
																				x			RMC29
																				x			RMC30
																				x			RMC31
																				x			RMC32
																				x			RMC33
																				x			RMC34
																				ü			RMC35
																				x			RMC36
																				x			RMC37
																				x			RMC38
																				x			RMC39
																				x			RMC40
																				x			RMC41
																				x			RMC42
																				x			RMC43
																				x			RMC44
																				x			RMC45
																				x			RMC46
																				x			RMC47
																				x			RMC48
																				x			RMC49
																				x			RMC50
																				x			RMC51
																				x			RMC52
																				x			RMC56
																				x			RMC57
																				x			RMC58
																				x			RMC59
																				x			RMC60
																				x			RMC61
																				x			RMC62
																				x			RMC63
																				x			RMC64
																				x			RMC65
																				ü			RMC66
																				x			RMC67
																				x			RMC68
																				x			RMC70
																				x			RMC71
																				x			RMC73
																				x			RMC74
																				x			RMC75
																				x			RMC76
																				x			RMC77
																				x			RMC78
																				x			RMC79
																				x			RMC80
																				x			RMC81
																				x			RMC84
																				ü			RMC85
																				x			RMC86
																				x			RMC87
																				x			RMC88
																				ü			RMC89
																				ü			RMC90
																				x			RMC91
																				x			RMC92
																				x			RMC93
																				x			RMC94
																				x			RMC95
																				x			RMC96
																				x			RMC98
																				x			RMC100
																				x			RMC101
																				x			RMC102
																				ü			RMC103
																				x			RMC104
																				x			RMC106
																				x			RMC107
																				ü			RMC108
																				x			RMC111
																				x			RMC112
																				ü			RMC114
																				ü			RMC115
																				x			RMC116
																				x			RMC117
																				x			RMC118
																				x			RMC119
																				x			RMC120
																				x			RMC122
																				x			RMC123
																				x			RMC124
																				ü			RMC125
																				ü			RMC127
																				x			RMC128
																				x			RMC129
																				x			RMC130
																				x			RMC131
																				x			RMC132
																				x			RMC133
																				x			RMC134
																				x			RMC135
																				x			RMC136
																				x			RMC137
																				ü			RMC138
																				x			RMC139
																				x			RMC141
																				x			RMC142
																				x			RMC143
																				x			RMC144
																				ü			RMC145
																				x			RMC146
																				x			RMC147
																				x			RMC148
																				x			RMC149
																				x			RMC150
																				x			RMC151
																				x			RMC152
																				x			RMC153
																				x			RMC155
																				x			RMC156
																				ü			RMC158
																				x			RMC159
																				x			RMC160
																				x			RMC161
																				ü			RMC162
																				x			RMC164
																				x			RMC165
																				ü			RMC166
																				x			RMC167
																				x			RMC168
																				x			RMC169
																				ü			RMC170
																				x			RMC171
																				x			RMC172
																				x			RMC173
																				x			RMC175
																				x			RMC176
																				x			RMC177
																				x			RMC178
																				ü			RMC179
																				x			RMC180
																				x			RMC181
																				x			RMC182
																				x			RMC183
																				x			RMC184
																				ü			RMC186
																				x			RMC187
																				x			RMC188
																				ü			RMC190
																				x			RMC191
																				x			RMC192
																				x			RMC193
																				x			RMC194
